# Supplementary material for: Mechanism and kinetics for the reaction of methyl peroxy radical with O2
Source: Royal Society of Chemistry journal article supplement (doi:10.1039/d1cp02427b), 2021-01-01
Supplement: d1cp02427b1.pdf [file d1cp02427b1.pdf]

## Supporting Information

### Mechanism and Kinetics for the Reaction of Methyl Peroxy Radical with O<sub>2</sub>

SandhyaLakshmanan,<sup>a,b\*</sup> William L. Hase<sup>a,c</sup>, Gregory P. Smith<sup>d\*</sup>

<sup>a</sup>Department of Chemistry and Biochemistry  
Texas Tech University  
Lubbock, Texas 79409 USA

<sup>b</sup>CSIR - National Institute of Science, Technology and Development Studies  
New Delhi-110060  
India

<sup>c</sup> deceased

<sup>d</sup> SRI International  
Menlo Park CA 94025 USA

\*Corresponding authors E-mail: [sandhiya@nistads.res.in](mailto:sandhiya@nistads.res.in)  
[gregory.smith@sri.com](mailto:gregory.smith@sri.com)

## Table of Contents

**Table S1:** Cartesian coordinates (Å) of the structures of RC, PC and TS calculated at UM06-2X/cc-pVTZ level of theory

**Table S2:**  $H_{298}$  (Hartrees) of the reactive species calculated at various levels of theory

**Table S3:** Frequencies ( $\text{cm}^{-1}$ ) of the stationary points calculated

**Table S4:**  $H_0(0)$  [Hartrees] of the stationary points involved in the studied reaction calculated at UM06-2X/cc-pVTZ and UCCSD(T)//UM06-2X/cc-pVTZ level of theories

## PES of H-Atom abstraction reaction

A product channel complex exists between  $\text{CH}_2\text{OO}$  and  $\text{HO}_2$ , PC1a, at 16.5 kcal/mol above the isolated reactants and requires 11.9 kcal/mol to break into the products  $\text{CH}_2\text{OO}$  and  $\text{HO}_2$ . An extensive reorientation along the surface is required to reach this configuration. In the presence of  $\text{HO}_2$ ,  $\text{CH}_2\text{OO}$  in this complex further undergoes isomerization to a dioxirane complex with  $\text{HO}_2$  with an energy barrier of 34.4 kcal/mol through TS2a. The product complex of dioxirane and  $\text{HO}_2$  (PC2a) lies 5.8 kcal/mol below the isolated reactants. PC2a further isomerizes to methylenebis(oxy) isomer, PC3a by O-O bond cleavage through a transition state TS3a with energy barrier of 11.4 kcal/mol. PC3a lies just 1 kcal/mol below the TS3a and further undergoes unimolecular dissociation to several products. The methylenebis(oxy) isomer in PC3a results in the formation of formic acid, PC4a through an H-atom shift reaction passing via transition state TS4a with an activation energy of 2.4 kcal/mol with respect to the separated reactants. The product complex of formic acid and  $\text{HO}_2$  is more stable by -95.6 kcal/mol.

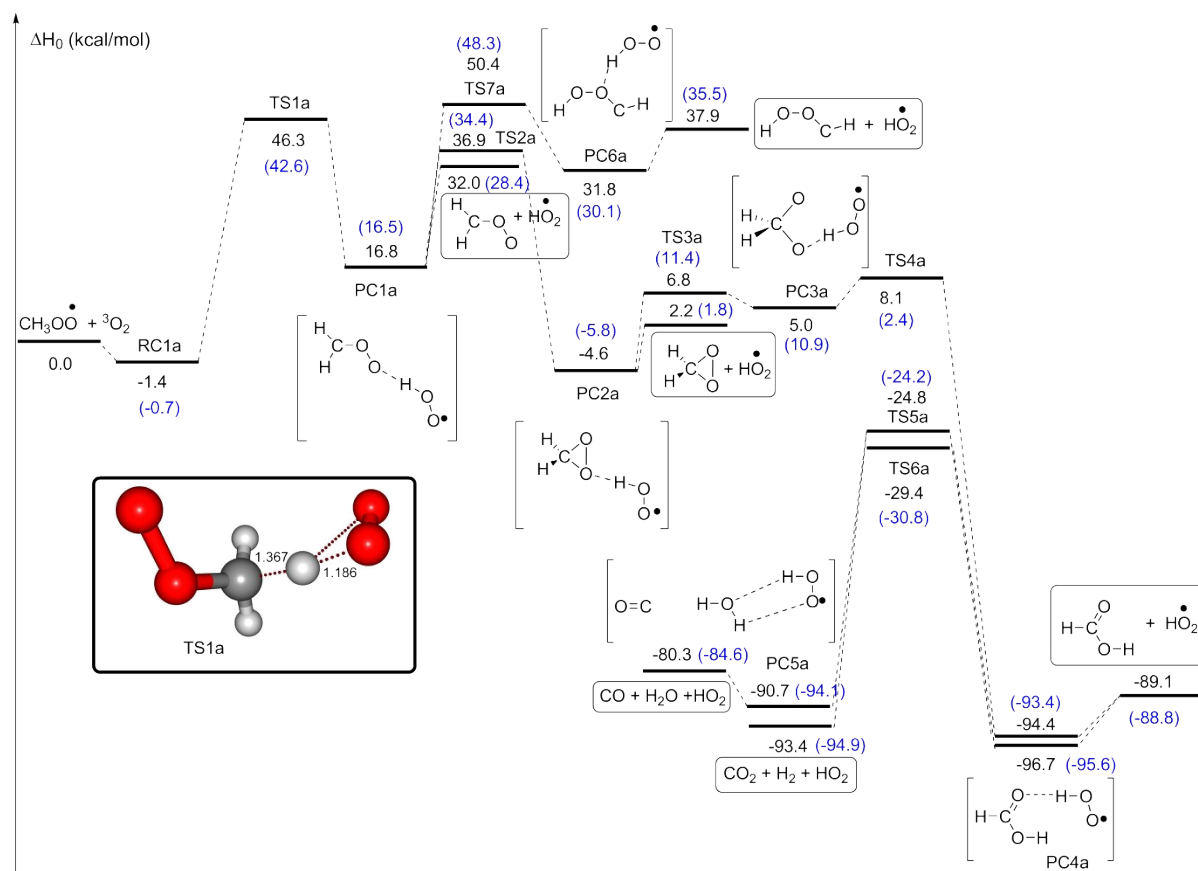

**Figure S1:** PES for the reaction between  $\text{CH}_3\text{O}_2$  and  $^3\text{O}_2$  through H-atom abstraction calculated at UM06-2X/cc-pVTZ level of theory. The values calculated at UCCSD(T)/cc-pVTZ//UM06-2X/cc-pVTZ level are in parenthesis. Energies,  $\Delta H_0(0)$  are in kcal/mol.

The final products of  $\text{CH}_3\text{O}_2$  oxidation through this pathway will be determined mainly from the decomposition routes of highly energetic formic acid product. The PES for formic acid dissociation was studied earlier<sup>30,31</sup> and  $\text{CO}_2 + \text{H}_2$  and  $\text{CO} + \text{H}_2\text{O}$  were identified as the main products. PC4a leads to two dissociation pathways, one forming  $\text{CO}_2 + \text{H}_2 + \text{HO}_2$  as products and another forming  $\text{CO} + \text{H}_2\text{O} + \text{HO}_2$  as products. These products are formed through transition states TS5a and TS6a with energy barriers of 71.4 and 64.8 kcal/mol with respect to PC4a. TS5a is a four-centred tight transition state in which the two H-atoms attached to C and O-atoms of formic acid migrate to form  $\text{H}_2$ . The reactions forming  $\text{CO}_2 + \text{H}_2 + \text{HO}_2$  and  $\text{CO} + \text{H}_2\text{O} + \text{HO}_2$  are highly exothermic by 92.7 and 82.2 kcal/mol, respectively, which is in good agreement with the ATcT<sup>12</sup> values of -94.1 and -84.3 kcal/mol. The  $\text{CH}_2\text{OO} + \text{HO}_2$  (PC1a) complex can also undergo H-shift reaction resulting in  $\text{HCOOH} + \text{HO}_2$  through transition state TS7a. The energy barrier required for this H-atom shift reaction is 48.3 kcal/mol, which is 13.9 kcal/mol higher than the energy barrier required for isomerization of  $\text{CH}_2\text{OO}$  to form dioxirane. This shows that the isomerization of  $\text{CH}_2\text{OO}$  is more favourable than the H-atom shift reaction.

The complexing of  $\text{HO}_2$  with the various  $\text{CH}_2\text{OO}$  species involved in the reaction does not alter the energetics much. For instance, the key intermediates dioxirane and formic acid formed by isomerization of  $\text{CH}_2\text{OO}$  without complexing with  $\text{HO}_2$  are exothermic by -24.5 and -118.6 kcal/mol, respectively calculated at UM06/6-311++G(d,p) level of theory with respect to  $\text{CH}_2\text{OO}$  in our previous study.<sup>32</sup> The formation of the same intermediates with  $\text{HO}_2$  complexation are -22.5 and -113.1 kcal/mol at UM06-2X/cc-pVTZ level of theory calculated with respect to  $\text{CH}_2\text{OO} + \text{HO}_2$  (PC1a) complex. The energy barrier also does not show any effect on  $\text{HO}_2$  complexation. Irrespective of the methods used, there is no significant influence on the activation energy as well as enthalpy on  $\text{HO}_2$  complexation with  $\text{CH}_2\text{OO}$  reactions. Taken together this result on the details of the surface and the high energy barrier associated with the initial step (TS1a), it may be concluded that the H-atom abstraction pathway is not a likely mechanism for significant  $\text{CH}_3\text{O}_2 + \text{O}_2$  reaction.

**Table S1: Cartesian coordinates(Å)of the structures of RC, PC and TS calculated at UM06-2X/cc-pVTZ level of theory**

**I. H-abstraction pathway**

**RC1a**

|   |              |              |              |
|---|--------------|--------------|--------------|
| 6 | 1.117585000  | -0.152398000 | -0.129704000 |
| 1 | 1.734705000  | 0.074202000  | 0.737055000  |
| 1 | 1.382316000  | -1.114374000 | -0.559044000 |
| 1 | 1.192786000  | 0.642334000  | -0.868503000 |
| 8 | -0.249217000 | -0.266829000 | 0.289559000  |
| 8 | -0.675309000 | 0.845567000  | 0.804408000  |
| 8 | 1.669938000  | 2.825461000  | 1.393567000  |
| 8 | 1.307396000  | 3.222697000  | 0.333143000  |

**TS1a**

|   |              |              |              |
|---|--------------|--------------|--------------|
| 6 | -0.510203000 | 0.841456000  | 0.278723000  |
| 1 | -0.258433000 | 0.439364000  | 1.258154000  |
| 1 | 0.592503000  | 0.354271000  | -0.367712000 |
| 1 | -0.483818000 | 1.911461000  | 0.111140000  |
| 8 | -1.612339000 | 0.299876000  | -0.282062000 |
| 8 | -1.912101000 | -0.890625000 | 0.130340000  |
| 8 | 1.653813000  | -0.106737000 | -0.631488000 |
| 8 | 2.271997000  | -0.271744000 | 0.448970000  |

**PC1a**

|   |              |              |              |
|---|--------------|--------------|--------------|
| 6 | -1.208965000 | 0.970215000  | 0.169096000  |
| 1 | -0.761973000 | 1.012495000  | 1.154418000  |
| 1 | 0.793904000  | -0.908594000 | 0.033590000  |
| 1 | -1.608503000 | 1.824793000  | -0.364787000 |
| 8 | -1.295754000 | -0.112537000 | -0.409503000 |
| 8 | -0.749989000 | -1.199598000 | 0.261686000  |
| 8 | 1.694747000  | -0.466109000 | -0.119167000 |
| 8 | 1.454791000  | 0.809496000  | 0.037259000  |

**TS2a**

|   |              |              |              |
|---|--------------|--------------|--------------|
| 6 | 0.920471000  | 0.892363000  | -0.151304000 |
| 1 | 0.496186000  | 1.708319000  | 0.426409000  |
| 1 | 1.050725000  | 0.983371000  | -1.223623000 |
| 8 | 1.512017000  | -0.043430000 | 0.489772000  |
| 8 | 0.784843000  | -0.966147000 | -0.392147000 |
| 1 | -0.665746000 | -0.929435000 | 0.047863000  |
| 8 | -1.613489000 | -0.567320000 | 0.212569000  |
| 8 | -1.483870000 | 0.687342000  | -0.103047000 |

**PC2a**

|   |              |              |              |
|---|--------------|--------------|--------------|
| 6 | 1.374445000  | 0.659438000  | -0.221723000 |
| 1 | 0.617486000  | 1.433987000  | -0.256978000 |
| 1 | 2.387594000  | 0.902796000  | -0.524878000 |
| 8 | 1.260009000  | -0.251668000 | 0.809644000  |
| 8 | 0.945121000  | -0.613408000 | -0.574566000 |
| 1 | -0.898575000 | -0.863316000 | -0.228074000 |
| 8 | -1.800315000 | -0.557713000 | 0.000836000  |
| 8 | -1.698962000 | 0.744027000  | 0.056619000  |

**TS3a**

|   |              |              |              |
|---|--------------|--------------|--------------|
| 6 | 1.695193000  | -0.011985000 | 0.130648000  |
| 1 | 2.071474000  | -0.147779000 | 1.168340000  |
| 1 | 2.622309000  | 0.148480000  | -0.459923000 |
| 8 | 1.121363000  | -1.148377000 | -0.278961000 |
| 8 | 0.982413000  | 1.133647000  | 0.120906000  |
| 1 | -0.847254000 | 0.653323000  | -0.263777000 |
| 8 | -1.772775000 | 0.409634000  | -0.458775000 |
| 8 | -2.083212000 | -0.467668000 | 0.463263000  |

**PC3a**

|   |              |              |              |
|---|--------------|--------------|--------------|
| 6 | 1.411515000  | 0.037179000  | 0.251177000  |
| 1 | 1.282510000  | -0.070214000 | 1.347397000  |
| 1 | 2.504370000  | 0.178218000  | 0.114730000  |
| 8 | 1.065484000  | -1.109912000 | -0.350852000 |
| 8 | 0.784502000  | 1.177139000  | -0.107588000 |
| 1 | -0.919755000 | 0.437088000  | -0.866740000 |
| 8 | -1.762900000 | 0.077513000  | -0.521709000 |
| 8 | -1.504113000 | -0.240761000 | 0.717343000  |

**TS4a**

|   |              |              |              |
|---|--------------|--------------|--------------|
| 6 | 1.328641000  | 0.044401000  | 0.276862000  |
| 1 | 1.726603000  | -0.057843000 | 1.300259000  |
| 1 | 2.281310000  | 0.109047000  | -0.417137000 |
| 8 | 1.102992000  | -1.071786000 | -0.383476000 |
| 8 | 0.773014000  | 1.176945000  | -0.001326000 |
| 1 | -0.938503000 | 0.628002000  | -0.749002000 |
| 8 | -1.768274000 | 0.175270000  | -0.489359000 |
| 8 | -1.487889000 | -0.398630000 | 0.649750000  |

**PC4a**

|   |              |              |              |
|---|--------------|--------------|--------------|
| 6 | 1.084885000  | -0.135771000 | -0.000527000 |
| 1 | 0.550305000  | -1.092569000 | -0.001708000 |
| 1 | 2.699022000  | -1.129311000 | -0.000525000 |
| 8 | 2.413230000  | -0.209755000 | 0.000353000  |
| 8 | 0.521462000  | 0.922088000  | 0.000192000  |
| 1 | -1.222877000 | 0.834602000  | -0.000430000 |
| 8 | -2.121533000 | 0.423497000  | -0.000203000 |
| 8 | -1.880130000 | -0.860592000 | 0.000387000  |

**TS5a**

|   |              |              |              |
|---|--------------|--------------|--------------|
| 6 | 1.245122000  | -0.030053000 | 0.000095000  |
| 1 | 0.539734000  | 1.132837000  | 0.000319000  |
| 1 | 1.533343000  | 1.304633000  | 0.000422000  |
| 8 | 2.440117000  | 0.314644000  | -0.000332000 |
| 8 | 0.522478000  | -0.963009000 | 0.000380000  |
| 1 | -1.350785000 | -0.898133000 | -0.001030000 |
| 8 | -2.185035000 | -0.384502000 | -0.000252000 |
| 8 | -1.801688000 | 0.862989000  | 0.000169000  |

**TS6a**

|   |              |             |             |
|---|--------------|-------------|-------------|
| 6 | -2.135257000 | 0.327932000 | 0.017259000 |
| 1 | 0.119724000  | 0.217976000 | 0.986060000 |
| 1 | -1.539867000 | 1.278561000 | 0.263796000 |
| 8 | -0.267371000 | 0.605579000 | 0.186710000 |

|   |              |              |              |
|---|--------------|--------------|--------------|
| 8 | -2.582246000 | -0.696247000 | -0.144317000 |
| 1 | 1.182780000  | 0.359739000  | -0.613324000 |
| 8 | 2.128444000  | 0.044987000  | -0.665340000 |
| 8 | 2.352286000  | -0.432303000 | 0.530436000  |

**PC5a**

|   |              |              |              |
|---|--------------|--------------|--------------|
| 6 | 2.670873000  | -0.039275000 | 0.029304000  |
| 1 | -0.778274000 | 0.926957000  | 0.769566000  |
| 1 | 0.528893000  | 0.757344000  | -0.031193000 |
| 8 | -0.380333000 | 1.064944000  | -0.098360000 |
| 8 | 3.722046000  | -0.423487000 | 0.022654000  |
| 1 | -1.641125000 | 0.062475000  | -0.776031000 |
| 8 | -2.466440000 | -0.461098000 | -0.616521000 |
| 8 | -2.642114000 | -0.369250000 | 0.674956000  |

**TS7a**

|   |              |              |              |
|---|--------------|--------------|--------------|
| 6 | 1.309628000  | -0.899684000 | -0.248682000 |
| 1 | 1.596328000  | -1.847032000 | 0.219402000  |
| 1 | 0.929820000  | 0.088189000  | -1.113548000 |
| 8 | 1.223775000  | 0.044443000  | 0.568692000  |
| 8 | 0.788675000  | 1.106627000  | -0.315128000 |
| 8 | -1.454621000 | -0.797493000 | -0.159975000 |
| 8 | -1.743808000 | 0.425131000  | 0.196756000  |
| 1 | -0.896083000 | 0.927273000  | 0.063481000  |

**PC6a**

|   |              |              |              |
|---|--------------|--------------|--------------|
| 6 | 1.696816000  | 0.890317000  | 0.171444000  |
| 1 | 2.190767000  | 1.495794000  | -0.611120000 |
| 1 | 0.527489000  | -0.561993000 | 1.185847000  |
| 8 | 1.328414000  | -0.118973000 | -0.471704000 |
| 8 | 0.625145000  | -1.094420000 | 0.370915000  |
| 8 | -1.569777000 | 0.733477000  | 0.408670000  |
| 8 | -1.857771000 | -0.200946000 | -0.458911000 |
| 1 | -1.107233000 | -0.828812000 | -0.395159000 |

**II. O<sub>2</sub> addition pathways**

**TS1b**

|   |              |              |              |
|---|--------------|--------------|--------------|
| 6 | -1.609509000 | 0.636636000  | 0.094271000  |
| 1 | -1.839598000 | 0.503851000  | 1.149706000  |
| 1 | -1.003883000 | 1.526306000  | -0.057808000 |
| 1 | -2.528391000 | 0.699902000  | -0.484503000 |
| 8 | -0.956281000 | -0.527925000 | -0.410964000 |
| 8 | 0.083351000  | -0.870567000 | 0.426552000  |
| 8 | 1.320678000  | -0.319983000 | -0.193758000 |
| 8 | 1.430868000  | 0.899740000  | 0.031542000  |

**PC1b**

|   |              |              |              |
|---|--------------|--------------|--------------|
| 6 | 1.451490000  | 0.355178000  | 0.099217000  |
| 1 | 0.885410000  | 1.153582000  | 0.574960000  |
| 1 | 2.356159000  | 0.144646000  | 0.665042000  |
| 1 | 1.688131000  | 0.605201000  | -0.932484000 |
| 8 | 0.733404000  | -0.891424000 | 0.155940000  |
| 8 | -0.409320000 | -0.779892000 | -0.698259000 |
| 8 | -1.450155000 | -0.229594000 | 0.123631000  |

|   |              |             |              |
|---|--------------|-------------|--------------|
| 8 | -1.634934000 | 1.007889000 | -0.173360000 |
|---|--------------|-------------|--------------|

#### **TS2b**

|   |              |              |              |
|---|--------------|--------------|--------------|
| 6 | 1.149217000  | 0.779348000  | 0.227085000  |
| 1 | -0.011411000 | 1.262261000  | -0.227159000 |
| 1 | 0.984295000  | 0.871427000  | 1.301249000  |
| 1 | 2.020312000  | 1.275098000  | -0.186133000 |
| 8 | 1.123863000  | -0.493295000 | -0.264062000 |
| 8 | -0.164098000 | -1.131208000 | -0.083262000 |
| 8 | -1.044193000 | -0.217889000 | 0.465217000  |
| 8 | -1.151635000 | 0.831783000  | -0.399202000 |

#### **PC2b**

|   |              |              |              |
|---|--------------|--------------|--------------|
| 6 | 1.514992000  | 0.757422000  | 0.063866000  |
| 1 | 1.331762000  | 1.037895000  | 1.090795000  |
| 1 | 2.401749000  | 1.056795000  | -0.473333000 |
| 1 | -0.918593000 | 1.357077000  | -0.536703000 |
| 8 | 1.113158000  | -0.489201000 | -0.312688000 |
| 8 | -0.021203000 | -0.868109000 | 0.441379000  |
| 8 | -1.132878000 | -0.480180000 | -0.274939000 |
| 8 | -1.447186000 | 0.837953000  | 0.088253000  |

#### **TS3b**

|   |              |              |              |
|---|--------------|--------------|--------------|
| 6 | 1.714268000  | 0.738970000  | 0.041653000  |
| 1 | -2.069392000 | 0.843948000  | 0.694034000  |
| 1 | 1.391199000  | 1.139146000  | 0.995187000  |
| 1 | 2.745510000  | 0.798654000  | -0.293822000 |
| 8 | 1.150681000  | -0.453930000 | -0.357000000 |
| 8 | 0.001536000  | -0.757372000 | 0.509372000  |
| 8 | -1.160007000 | -0.545311000 | -0.229330000 |
| 8 | -1.536325000 | 0.854667000  | -0.128706000 |

### **III. Concerted O<sub>2</sub>-addition and H-atom abstraction pathways**

#### **RC1c**

|   |              |              |              |
|---|--------------|--------------|--------------|
| 6 | -1.531525000 | 0.981878000  | 0.134858000  |
| 1 | -1.922270000 | 0.949634000  | 1.148993000  |
| 1 | -0.527542000 | 1.399875000  | 0.124677000  |
| 1 | -2.192666000 | 1.538942000  | -0.522569000 |
| 8 | -1.483774000 | -0.351845000 | -0.388251000 |
| 8 | -0.732025000 | -1.112078000 | 0.347727000  |
| 8 | 2.240951000  | 0.228235000  | 0.442516000  |
| 8 | 1.703803000  | 0.013223000  | -0.597021000 |

#### **TS1c**

|   |              |              |              |
|---|--------------|--------------|--------------|
| 6 | 0.151012000  | -0.748285400 | 0.328723100  |
| 1 | 0.068579900  | -1.632220000 | -0.111628300 |
| 1 | 0.197202400  | -0.480244600 | 1.356038500  |
| 8 | 1.600852100  | 0.295837500  | 0.276246700  |
| 8 | -0.916168900 | -0.465156600 | -0.287454900 |
| 8 | -1.593193000 | 0.603472300  | 0.270019900  |
| 8 | 0.696060000  | 0.319778500  | -0.599444700 |
| 1 | 1.307037800  | -0.938336100 | 0.245487400  |

#### **PC1c**

|   |              |             |             |
|---|--------------|-------------|-------------|
| 6 | -0.072502000 | 0.943748000 | 0.277764000 |
|---|--------------|-------------|-------------|



|   |              |              |              |
|---|--------------|--------------|--------------|
| 1 | 0.893469000  | -1.350303000 | -0.008597000 |
| 1 | -0.228132000 | 1.985634000  | 0.008341000  |
| 1 | 0.089045000  | 0.791295000  | 1.343564000  |
| 8 | -1.327684000 | 0.301405000  | -0.075874000 |
| 8 | -1.224152000 | -0.991673000 | -0.036180000 |
| 8 | 0.972429000  | 0.462574000  | -0.463845000 |
| 8 | 1.539485000  | -0.658446000 | 0.199663000  |

**TS2c**

|   |              |              |              |
|---|--------------|--------------|--------------|
| 6 | 0.110943000  | 0.081752000  | 0.432877000  |
| 1 | 0.736704000  | -1.057033000 | 0.270066000  |
| 1 | -0.182462000 | 0.195896000  | 1.477343000  |
| 1 | -2.704371000 | 0.337195000  | -0.017598000 |
| 8 | 1.249915000  | 0.692939000  | 0.032108000  |
| 8 | 1.884190000  | -0.607899000 | -0.181173000 |
| 8 | -0.902151000 | 0.282109000  | -0.466445000 |
| 8 | -2.046395000 | -0.362970000 | 0.074626000  |

**PC2c**

|   |              |              |              |
|---|--------------|--------------|--------------|
| 6 | 0.836961000  | -0.585016000 | 0.446937000  |
| 1 | -1.858448000 | 0.223955000  | -0.433394000 |
| 1 | 0.900632000  | -1.225040000 | 1.329876000  |
| 1 | 0.550248000  | 0.909559000  | -1.031957000 |
| 8 | 1.264304000  | -0.810162000 | -0.644329000 |
| 8 | -2.064818000 | -0.667466000 | -0.099080000 |
| 8 | 0.202412000  | 0.549928000  | 0.778699000  |
| 8 | 0.021328000  | 1.377903000  | -0.353558000 |

**TS3c**

|   |              |              |              |
|---|--------------|--------------|--------------|
| 6 | 0.697009000  | -0.342299000 | -0.012835000 |
| 1 | -2.085904000 | -0.529735000 | 0.291667000  |
| 1 | -0.347181000 | -0.890642000 | -0.056669000 |
| 1 | -0.877413000 | 1.843577000  | -0.774580000 |
| 8 | 1.752479000  | -0.862798000 | -0.008246000 |
| 8 | -1.657195000 | -1.340071000 | -0.028074000 |
| 8 | 0.578483000  | 1.013364000  | 0.038221000  |
| 8 | -0.782712000 | 1.393328000  | 0.075173000  |

**TS4c**

|   |              |              |              |
|---|--------------|--------------|--------------|
| 6 | -0.038418000 | 0.613433000  | 0.161665000  |
| 1 | 1.069709000  | -0.647608000 | 1.268786000  |
| 1 | -0.538028000 | 1.559207000  | 0.331526000  |
| 1 | 0.458584000  | -0.198860000 | 1.659189000  |
| 8 | -0.857798000 | -0.425382000 | -0.191534000 |
| 8 | -2.112387000 | -0.104713000 | -0.013341000 |
| 8 | 1.166449000  | 0.613971000  | -0.226861000 |
| 8 | 1.708765000  | -0.633043000 | -0.096951000 |

**TS5c**

|   |              |              |              |
|---|--------------|--------------|--------------|
| 6 | -0.018622000 | -0.647774000 | 0.212447000  |
| 1 | 0.270949000  | -1.669015000 | -0.050525000 |
| 1 | 0.074758000  | -0.427697000 | 1.281167000  |
| 1 | 1.090426000  | 1.044957000  | 0.027646000  |
| 8 | 2.175423000  | 0.156054000  | 0.226514000  |
| 8 | 0.810974000  | 0.231892000  | -0.529562000 |

|   |              |              |              |
|---|--------------|--------------|--------------|
| 8 | -1.352566000 | -0.460590000 | -0.221091000 |
| 8 | -1.799382000 | 0.689944000  | 0.207518000  |

**TS6c**

|   |              |              |              |
|---|--------------|--------------|--------------|
| 6 | -0.230906000 | 0.843305000  | 0.271220000  |
| 1 | -0.404799000 | 1.137608000  | 1.307566000  |
| 1 | 0.310722000  | 1.585424000  | -0.307106000 |
| 8 | -1.410012000 | 0.426251000  | -0.369252000 |
| 8 | -1.175790000 | -0.904839000 | 0.025968000  |
| 8 | 0.397931000  | -0.444044000 | 0.237195000  |
| 8 | 2.064382000  | 0.050182000  | -0.221495000 |
| 1 | 2.467434000  | -0.803261000 | -0.007111000 |

**Table S2:  $H_{298}$  (Hartrees) of the reactive species calculated at various levels of theory**

| Species            | CBS-QB3     | G3B3        | M06-2X/cc-pVTZ | UCCSD(T)/cc-pVTZ |
|--------------------|-------------|-------------|----------------|------------------|
| CH <sub>3</sub> OO | -189.954731 | -190.088917 | -190.157509    | -189.8951244     |
| O <sub>2</sub>     | -150.161303 | -150.184576 | -150.314423    | -150.1210078     |
| CO                 | -113.178703 | -113.266664 | -113.310376    | -113.1466619     |
| H <sub>2</sub> O   | -76.333711  | -76.379947  | -76.399905     | -76.306806       |
| HO <sub>2</sub>    | -150.737299 | -150.826145 | -150.885750    | -150.6937276     |
| CO <sub>2</sub>    | -188.368492 | -188.500733 | -188.576087    | -188.3112222     |
| OH                 | -75.646415  | -75.693062  | -75.718588     | -75.6258244      |
| H <sub>2</sub> CO  | -114.340363 | -114.429933 | -114.465762    | -114.3027053     |
| HCOOH              | -189.523325 | -189.656724 | -189.727305    | -189.4631695     |
| H <sub>2</sub>     | -1.162774   | -1.164167   | -1.155393      | -1.1588556       |

**Table S3: Frequencies(cm<sup>-1</sup>) of the stationary points calculated**

| <b>RC1a</b> |             | <b>PC1a</b> | <b>TS2a</b> | <b>PC2a</b> | <b>TS3a</b> | <b>PC3a</b> | <b>TS4a</b> |
|-------------|-------------|-------------|-------------|-------------|-------------|-------------|-------------|
| 31.0301     |             | 63.4048     | -699.534    | 62.4462     | -54.0535    | 71.0549     | -           |
| 54.4081     |             | 94.7676     | 103.1278    | 77.3522     | 46.3701     | 90.058      | 1161.8442   |
| 58.7136     |             | 187.29      | 146.529     | 147.0375    | 70.9394     | 148.5411    | 75.0113     |
| 75.567      |             | 259.3419    | 185.2682    | 176.5114    | 111.8913    | 163.1459    | 104.1687    |
| 116.9052    |             | 325.3637    | 319.3648    | 219.4192    | 205.8098    | 216.9196    | 120.4772    |
| 163.4906    |             | 518.2874    | 401.2648    | 479.7473    | 377.4302    | 389.8924    | 171.2608    |
| 515.898     |             | 689.5996    | 828.5349    | 916.2491    | 597.723     | 606.3824    | 222.7391    |
| 984.4969    |             | 816.5549    | 905.6426    | 937.5574    | 607.1657    | 610.4204    | 413.0036    |
| 1149.6167   |             | 872.3585    | 998.3916    | 1062.4542   | 918.5521    | 939.5098    | 480.8587    |
| 1204.6709   |             | 1115.9296   | 1140.3181   | 1196.2281   | 949.542     | 964.395     | 668.8585    |
| 1293.4755   |             | 1254.4096   | 1218.0314   | 1281.8043   | 1143.586    | 1134.9768   | 977.3264    |
| 1458.684    |             | 1306.2227   | 1322.2676   | 1283.4178   | 1223.5638   | 1235.3018   | 1143.721    |
| 1485.6396   |             | 1452.3891   | 1419.6999   | 1365.7514   | 1270.0388   | 1282.279    | 1280.3593   |
| 1495.992    |             | 1648.2067   | 1573.2137   | 1518.286    | 1289.7375   | 1296.8292   | 1290.0749   |
| 1757.6608   |             | 1694.1795   | 1623.7945   | 1546.4871   | 1525.4992   | 1517.7324   | 1369.4691   |
| 3083.3164   |             | 2863.2887   | 2680.2022   | 3124.0747   | 2890.7186   | 2908.0238   | 1518.8705   |
| 3174.1125   |             | 3144.7141   | 3119.6642   | 3239.5308   | 2920.9837   | 2941.5978   | 2439.4478   |
| 3190.3378   |             | 3290.4967   | 3252.0343   | 3575.634    | 3620.6423   | 3589.9073   | 2989.2913   |
|             |             |             |             |             |             |             | 3564.6204   |
| <b>PC4a</b> | <b>TS5a</b> | <b>TS6a</b> | <b>PC5a</b> | <b>TS7a</b> | <b>PC6a</b> |             | <b>PC1b</b> |
| 64.523      | -2218.7946  | -1641.6559  | 16.2025     | -1736.9334  | 33.3739     |             | 57.5167     |
| 83.4688     | 50.9937     | 24.663      | 37.6294     | 82.9029     | 68.6268     |             | 160.3332    |
| 128.0962    | 90.7548     | 62.1539     | 88.927      | 92.0816     | 133.147     |             | 189.5632    |
| 176.6748    | 120.3683    | 95.6775     | 106.7117    | 200.6004    | 162.0996    |             | 348.0588    |
| 229.1677    | 160.5857    | 178.5152    | 108.0268    | 206.5939    | 246.297     |             | 386.0537    |
| 545.23      | 215.2128    | 290.6196    | 183.8298    | 278.689     | 476.9349    |             | 502.9047    |
| 639.2846    | 448.9841    | 331.419     | 287.8667    | 726.1316    | 554.9009    |             | 739.1169    |
| 697.0035    | 603.426     | 466.5588    | 308.2647    | 783.8744    | 577.5664    |             | 999.5546    |
| 1086.5906   | 763.0331    | 698.7282    | 415.519     | 807.8307    | 707.986     |             | 1106.0665   |
| 1176.5496   | 1026.4205   | 721.6318    | 526.1583    | 941.9847    | 877.4625    |             | 1184.5758   |
| 1291.5101   | 1030.8812   | 750.3844    | 715.7445    | 1180.2717   | 1276.3252   |             | 1229.5056   |
| 1307.4421   | 1288.3265   | 1058.5823   | 1290.5533   | 1288.0923   | 1295.9503   |             | 1401.9088   |
| 1435.7875   | 1413.6674   | 1292.4952   | 1579.7922   | 1293.9857   | 1385.7749   |             | 1461.8599   |
| 1558.5106   | 1505.4856   | 1610.1439   | 1626.854    | 1561.2888   | 1473.9175   |             | 1483.9404   |
| 1866.4056   | 1908.4331   | 2045.1267   | 2299.3094   | 1575.3251   | 1512.7019   |             | 1511.4307   |
| 3091.1014   | 2141.8816   | 2688.8125   | 3358.5522   | 2126.4909   | 2983.5075   |             | 3069.9466   |
| 3384.1702   | 2205.6952   | 3187.554    | 3814.5657   | 3102.047    | 3561.2695   |             | 3152.7585   |
| 3870.4966   | 3575.7782   | 3785.8542   | 3905.3367   | 3263.8404   | 3641.4329   |             | 3177.2985   |
| <b>TS2b</b> | <b>PC2b</b> | <b>TS3b</b> |             |             | <b>PC1c</b> | <b>TS2c</b> | <b>PC2c</b> |
| -1973.7375  | 91.4215     | -209.1425   |             |             | 60.2044     | -1802.1438  | -96.1195    |
| 152.6529    | 180.2072    | 100.5357    |             |             | 136.6876    | 98.358      | 69.7167     |
| 392.5624    | 265.7655    | 155.2318    |             |             | 252.3333    | 182.648     | 137.7923    |
| 509.2484    | 387.7534    | 373.5406    |             |             | 339.246     | 211.8896    | 254.2314    |
| 563.3733    | 455.7658    | 441.6479    |             |             | 422.5678    | 346.8591    | 329.5879    |
| 634.1992    | 524.8791    | 526.7428    |             |             | 611.538     | 526.3668    | 359.1653    |
| 738.5482    | 656.6591    | 532.2423    |             |             | 1024.935    | 738.7254    | 422.0715    |
| 837.316     | 732.3988    | 656.5829    |             |             | 1048.1478   | 932.1743    | 528.7239    |
| 916.0173    | 837.4119    | 844.7649    |             |             | 1142.7601   | 1023.562    | 869.8247    |
| 1039.1571   | 949.0706    | 932.4026    |             |             | 1174.1744   | 1053.6851   | 965.2751    |
| 1095.1235   | 1012.1833   | 1009.0553   |             |             | 1231.6639   | 1167.1655   | 1030.7197   |
| 1152.3509   | 1170.9849   | 1162.8627   |             |             | 1289.513    | 1176.7999   | 1202.3381   |
| 1218.5772   | 1219.466    | 1213.0681   |             |             | 1414.099    | 1217.4419   | 1376.4169   |
| 1281.1291   | 1444.3429   | 1426.7064   |             |             | 1430.2526   | 1358.2831   | 1505.6206   |
| 1447.6202   | 1446.6991   | 1445.303    |             |             | 1520.1582   | 1440.3936   | 1853.0064   |
| 1715.248    | 3156.2448   | 3178.135    |             |             | 3086.2809   | 2019.5173   | 3134.2017   |
| 3077.5462   | 3300.1444   | 3328.3991   |             |             | 3159.0366   | 3107.13     | 3595.2563   |
| 3217.2006   | 3764.6853   | 3795.6841   |             |             | 3828.4929   | 3837.6871   | 3734.5037   |

| <b>TS3c</b> | <b>TS4c</b> | <b>TS5c</b> | <b>TS6c</b> |  |  |  |  |
|-------------|-------------|-------------|-------------|--|--|--|--|
| -910.4754   | -983.3287   | -1171.0708  | -1220.6497  |  |  |  |  |
| 112.7525    | 99.7515     | 73.8723     | 117.5899    |  |  |  |  |
| 158.0489    | 253.2795    | 142.2217    | 204.8278    |  |  |  |  |
| 182.3726    | 457.9741    | 298.5923    | 244.434     |  |  |  |  |
| 242.457     | 543.9513    | 386.3687    | 284.6332    |  |  |  |  |
| 362.2131    | 693.4066    | 600.6625    | 434.5333    |  |  |  |  |
| 412.6542    | 734.2064    | 816.2229    | 761.4068    |  |  |  |  |
| 590.904     | 813.1592    | 987.4756    | 900.8754    |  |  |  |  |
| 725.0502    | 981.0392    | 1026.6557   | 973.0044    |  |  |  |  |
| 893.4698    | 1048.979    | 1089.7795   | 1042.6376   |  |  |  |  |
| 1019.9107   | 1131.4181   | 1199.6632   | 1128.0413   |  |  |  |  |
| 1064.3223   | 1144.3514   | 1250.8938   | 1155.2695   |  |  |  |  |
| 1139.9059   | 1258.6466   | 1294.111    | 1202.3972   |  |  |  |  |
| 1437.288    | 1302.2027   | 1387.577    | 1383.4492   |  |  |  |  |
| 1462.7617   | 1397.9485   | 1477.0044   | 1533.8721   |  |  |  |  |
| 1947.3109   | 1530.1326   | 3140.0001   | 3079.3675   |  |  |  |  |
| 3788.9067   | 2733.6864   | 3181.0348   | 3184.5485   |  |  |  |  |
| 3821.3648   | 3228.1654   | 3238.9978   | 3823.7418   |  |  |  |  |

**Table S4:**  $H_0(0)$  [Hartrees] of the stationary points involved in the studied reaction calculated at UM06-2X/cc-pVTZ and UCCSD(T)//UM06-2X/cc-pVTZ level of theories.

| Stationary points                                              | UM06-2X/cc-pVTZ | UCCSD(T)//UM06-2X/cc-pVTZ |
|----------------------------------------------------------------|-----------------|---------------------------|
| <b>H-atom abstraction</b>                                      |                 |                           |
| RC1a                                                           | -340.481317     | -340.0244205              |
| TS1a                                                           | -340.405257     | -339.9552524              |
| PC1a                                                           | -340.452254     | -339.9969768              |
| TS2a                                                           | -340.420213     | -339.9683894              |
| PC2a                                                           | -340.486824     | -340.0305377              |
| TS3a                                                           | -340.468176     | -340.0050478              |
| PC3a                                                           | -340.471030     | -340.0056978              |
| TS4a                                                           | -340.466106     | -340.0193993              |
| PC4a                                                           | -340.629470     | -340.1720749              |
| TS5a                                                           | -340.518576     | -340.0617314              |
| PC5a                                                           | -340.623557     | -340.1732302              |
| TS6a                                                           | -340.525823     | -340.072417               |
| TS7a                                                           | -340.398702     | -339.946232               |
| PC6a                                                           | -340.428346     | -339.9751751              |
| <b>O<sub>2</sub> addition</b>                                  |                 |                           |
| TS1b                                                           | -340.440689     | -339.9883501              |
| PC1b                                                           | -340.442589     | -339.9927961              |
| TS2b                                                           | -340.389000     | -339.9272567              |
| PC2b                                                           | -340.418285     | -339.9632495              |
| TS3b                                                           | -340.383807     | -339.9601229              |
| <b>Concerted H-atom abstraction and O<sub>2</sub> addition</b> |                 |                           |
| RC1c                                                           | -340.481317     | -340.0244205              |
| TS1c                                                           | -340.469144     | -340.00170793             |
| PC1c                                                           | -340.514860     | -340.0552219              |
| TS2c                                                           | -340.441771     | -339.9849644              |
| PC2c                                                           | -340.581895     | -340.1261627              |
| TS3c                                                           | -340.570145     | -340.1138163              |
| TS4c                                                           | -340.423270     | -339.9367327              |
| TS5c                                                           | -340.423376     | -339.9676583              |
| TS6c                                                           | -340.405742     | -339.9607891              |
